# Supplementary material
Source: HighWire-hosted journal article supplement (http://jpet.aspetjournals.org/highwire/filestream/136641/field_highwire_adjunct_files/1/227066_suppl_fig_2.pdf)
Supplement: 227066_suppl_fig_2.pdf [file 227066_suppl_fig_2.pdf]

**Supplemental Data**

New multi-target antagonists of  $\alpha_{1A}$ -,  $\alpha_{1D}$ -adrenoceptors and 5-HT<sub>1A</sub> receptors reduce human hyperplastic prostate cell growth and the increase of intraurethral pressure

Jéssica B Nascimento-Viana, Aline R Carvalho, Luiz Eurico Nasciutti, Rocío Alcántara-Hernández, Fernanda Chagas-Silva, Pedro A R Souza, Luiz Antônio S Romeiro, J Adolfo García-Sáinz, François Noël, and Claudia Lucia Martins Silva

Journal of Pharmacology and Experimental Therapeutics

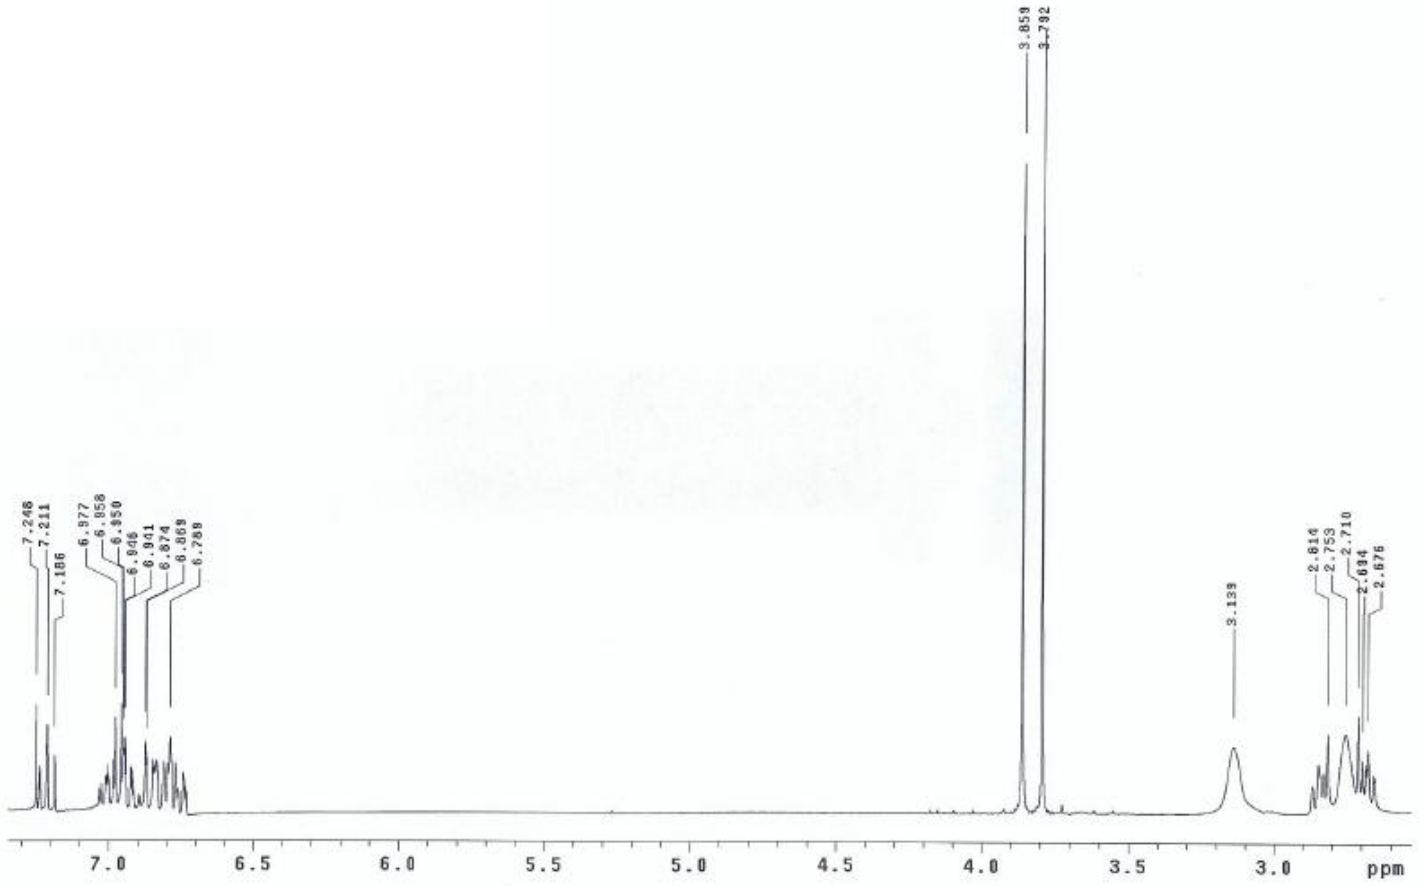

Supplemental Figure 2A. <sup>1</sup>H-NMR mass spectrum of LDT3.

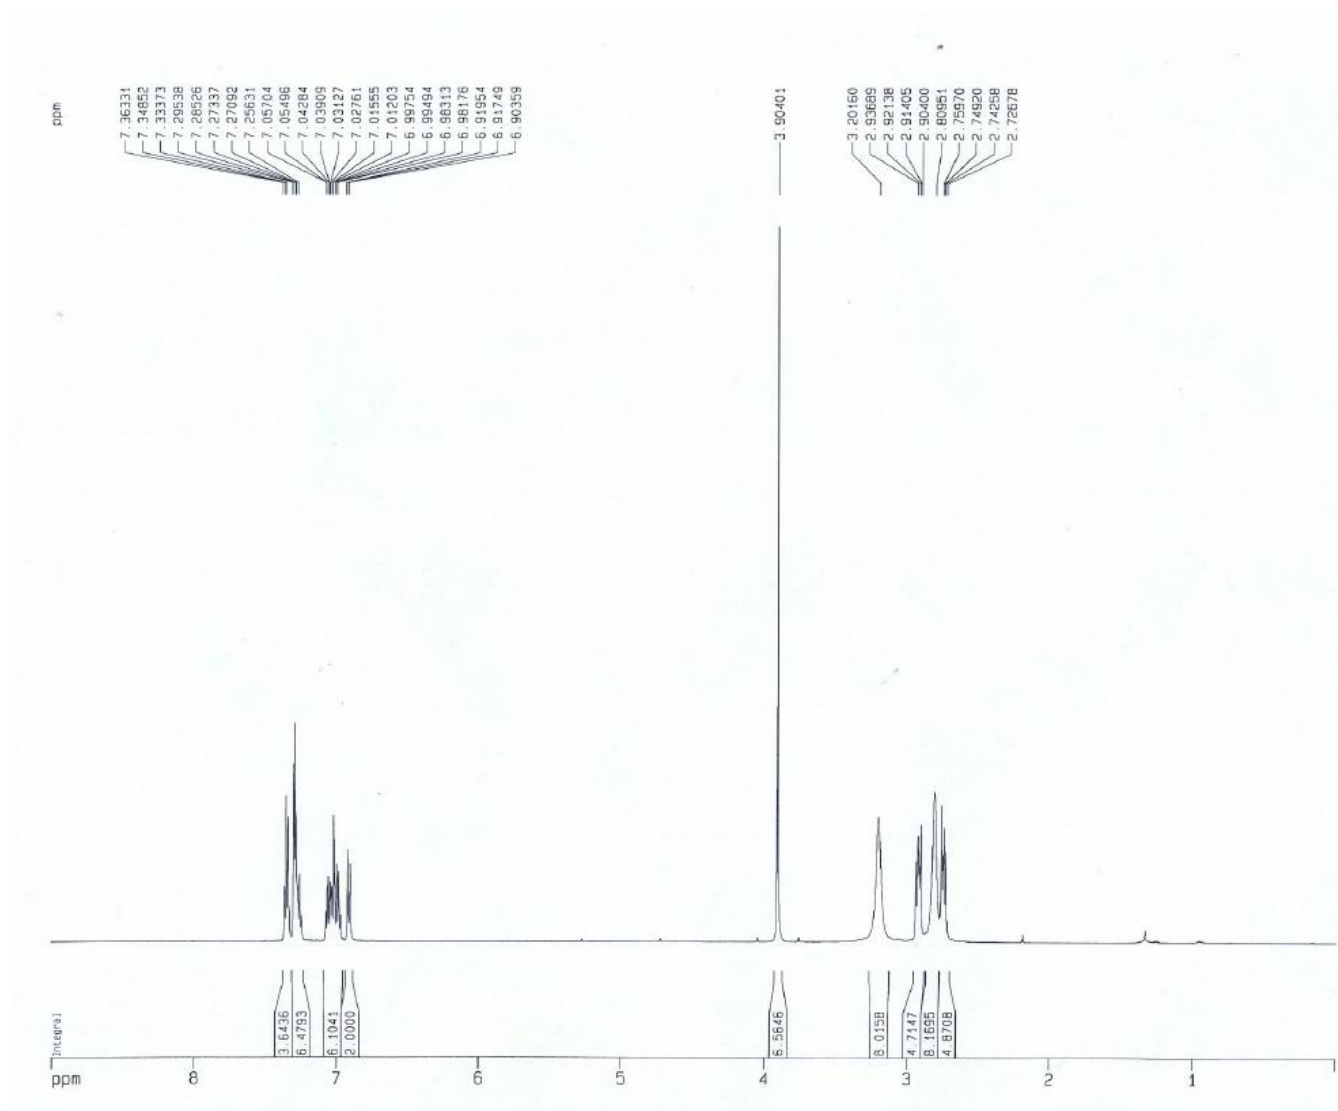Supplemental Figure 2B. <sup>1</sup>H-NMR mass spectrum of LDT5.

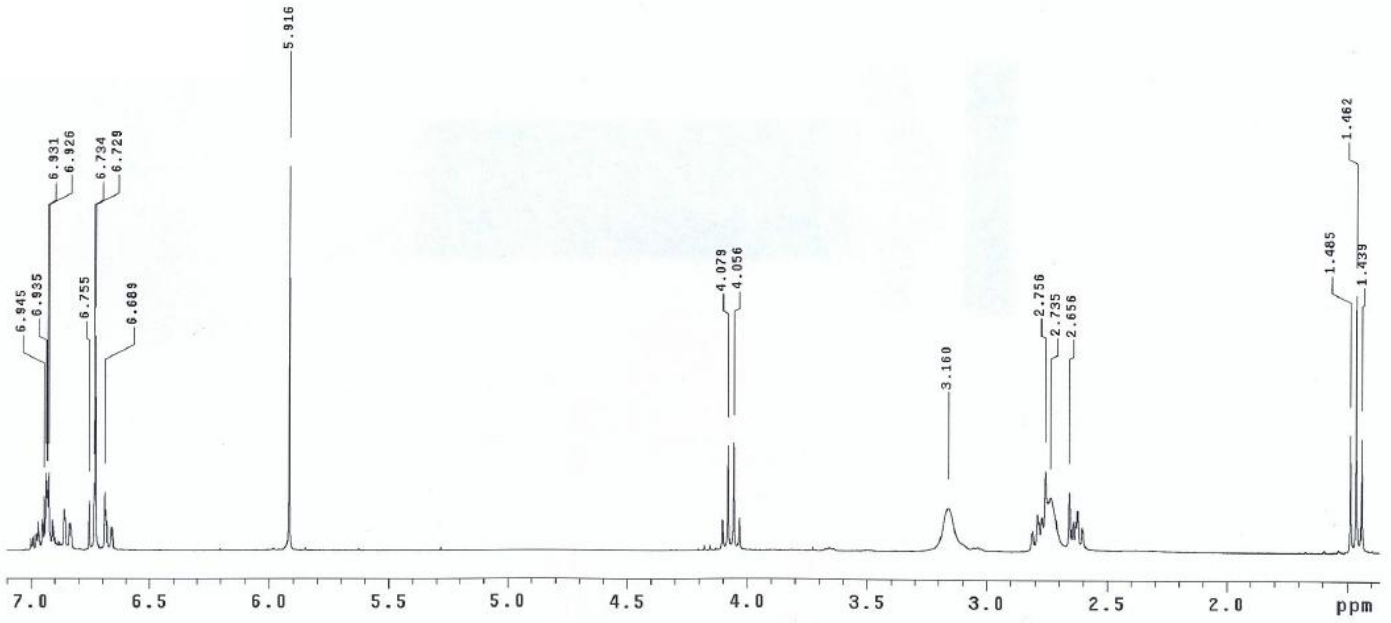

Supplemental Figure 2C. <sup>1</sup>H-NMR mass spectrum of LDT8.
